# Supplementary material for: Selective scandium ion capture via coordination templating in a covalent organic framework
Source: Research Square preprint supplement (doi:10.21203/rs.3.rs-155458/v1), 2021-04-09
Supplement: Supplementary file 1 [file be7ad2d311f638f13691ea86.docx]

Supplementary Information

**Selective scandium ion capture via coordination templating in a covalent organic framework**

Ye Yuan,1† Yajie Yang,1† Katie R. Meihaus,2 Shenli Zhang,3 Xin Ge,4 Wei Zhang,4 Roland Faller,5 Jeffrey R. Long,2,6* and Guangshan Zhu1,*

1 Key Laboratory of Polyoxometalate Science of the Ministry of Education, Faculty of Chemistry, Northeast Normal University, Changchun 130024, China.

2 Department of Chemistry and Department of Chemical & Biomolecular Engineering, University of California, Berkeley, California 94720, United States.

3 Pritzker School of Molecular Engineering, University of Chicago, Chicago, IL 60615, United States.

4 Electron Microscopy Center, Jilin University, Changchun 130012, China.

5 Department of Chemical Engineering, University of California, Davis, CA 95616, United States.

6 Materials Sciences Division, Lawrence Berkeley National Laboratory, Berkeley, California 94720, United States.

**Table of Contents**

| 1. General information | 2 |
| --- | --- |
| 2. Physical measurements | 2 |
| 3. Scandium(III) uptake experiments | 3 |
| 4. Characterization data | 5 |
| 5. DFT calculations | 17 |
| 6. Yttrium(III) and lanthanum(III) uptake in MICOF-33 | 19 |
| 7. Preparation of MICOF-33 using earth-abundant template metal ions | 20 |
| 8. References | 22 |

**1. General information**

All reagents were purchased from Sigma-Aldrich or Alfa Aesar and used as received, unless otherwise indicated.

**Preparation of NICOF-33 (non-imprinted COF).** A pyrex tube was charged with 0.6 mL each of mesitylene and dioxane, 0.2 mL of 3 M aqueous acetic acid, triformylphloroglucinol (25.2 mg, 0.120 mmol), and *para*-phenylenediamine and 4-aminophenylacetic acid (3 mM) in 1:1 molar ratio. The tube was sonicated to homogenize the mixture homogeneous, flash frozen at 77 K, and degassed by three times freeze–pump–thaw. Finally, the pyrex tube was heated at 120 °C for 72 h. The tube was then cooled to room temperature and the mixture filtered to yield a colorless precipitate. The solid was washed three times with *N,N*-dimethylacetamide and then acetone, and then dried under vacuum at 100 °C to obtain NICOF-33.

*Reusability test:* After saturation of MICOF-33 with scandium(III), 1 M NaOH (10 mL) was added to the sample, the mixture was sonicated for 30 min, and the resulting solids were collected by filtration. This solid was then combined with 1 M aqueous HCl (10 mL), the mixture sonicated for 30 min, and the resulting solid was again isolated by filtration. The latter steps were repeated three times and the solid was finally collected by filtration, washed with distilled water (10 mL) and acetone (10 mL), respectively, and then dried under vacuum at 100 °C for 12 h, yielding fresh MICOF-33 sample for the next adsorption.

**2. Physical measurements**

*Nitrogen adsorption* measurements were performed using a Quantachrome Autosorb-iQ, and pore size distribution was obtained on a Micromeritics ASAP 2010M analyzer. *Thermogravimetric analysis* data were collected in air using a Netzch STA 449c thermal analyzer with a heating rate of 10 °C/min.

*Fourier transform infrared spectra* were obtained using a Nicolet Impact 410 FTIR spectrometer.

*Scanning electron microscopy* data were collected using the JEOL JSM 6700 scanning electron microscope.

*X-ray photoelectron spectra* were obtained using a Kratos Axis Ultra system.

*Elemental analysis* (C, H, N) data were obtained using a Perkin Elmer 2400 Series II CHNS/O Analyzer.

*Solid-state 13C-NMR* spectroscopy was performed using a Bruker Avance 400 MHz Solid-State NMR pectrometer.

*Inductively coupled plasma mass spectrometry* (ICP-MS) data were obtained using a PerkinElmer Optima 3300DV.

Transmission and scanning transmission electron microscopy images were obtained using a JEOL JEM Grand ARM300F within the Electron Microscopy Center and School of Materials Science & Engineering, Jilin University, China.

3. Scandium(III) uptake experiments

3.I Scandium adsorption in MICOF-33 as a function of initial Sc3+ concentration. In an Erlenmeyer flask, scandium(III) solutions with concentrations ranging from 2 to 500 ppm were prepared by dissolving scandium(III) chloride hexahydrate in 100 mL aqueous solution containing HCl (pH ~5.5). To each solution, 10 mg of MICOF-33 was added and the solutions were stirred for 180 min. The solutions were then analyzed by ICP-MS to determine the final scandium(III) concentration. The quantity of adsorbed Sc3+ was determined by subtracting the final concentration from the initial concentration.

The resulting concentration dependent scandium(III) uptake data (see Fig. 3a in the main text and Supplementary Table 2) were fit using the Langmuir model:

(S1)

where *ce* represents the equilibrium concentration of ions; *qm* is the maximum (saturation) capacity; *KL* is the Langmuir binding constant; and *qe*(mg/g) is the equilibrium adsorption capacity given by:

(S2)

where c0 represents the initial scandium(III) concentration in solution, *ce* is the equilibrium concentration, *V* is the volume of the solution, and *m* represents the mass of MICOF-33. The resulting fit parameters were *qm* = 58.9 mg/g, *KL* = 0.19 L/mg and R2 = 0.9998.

**3.II Scandium(III) adsorption kinetics in MICOF-33.** In an Erlenmeyer flask, a 20 ppm scandium(III) solution was prepared by dissolving scandium(III) chloride hexahydrate in 100 mL aqueous solution containing HCl (pH ~ 5.5). This solution was stirred with 10 mg of MICOF-33, and at various time intervals, 3 mL aliquots were removed from the mixture, filtered, and the filtrate was analyzed by ICP-MS to determine the remaining Sc3+ concentration.

The resulting uptake versus time data (Fig. 3b in the main text and Supplementary Table 3) were fit using the pseudo-second order model:

(S3)

where *t* is the adsorption time; *qt* and *qe* are the amount of metal ions adsorbed at time *t* and at equilibrium, respectively; and *k2* is the constant of adsorption for the pseudo-second order model.

**3.III Sc3+ uptake under acidic conditions.** In Erlenmeyer flasks, separate 100 mL aqueous solutions were prepared containing 20 ppm of scandium(III) (from scandium(III) chloride hexahydrate) and 0.1, 1, 3, 6, or 10 M aqueous HCl. To each solution, 10 mg of MICOF-33 was added, and the solutions were left to stir in air. At 5, 10, 30, 60, 90, 120 and 180 min intervals, 3 mL aliquots were removed from each solution, filtered, and the filtrates were analyzed by ICP-MS to determine the scandium(III) ion concentration. The resulting data are plotted for each solution in Fig. 3c of the main text and given in Supplementary Table 4 below.

**3.IV Determination of the distribution coefficient.** In an Erlenmeyer flask, 10 mg of MICOF-33 was added to a 100 mL aqueous HCl solution (pH ~5.5) and 1.2 mg scandium(III) chloride hexahydrate (initial Sc3+ concentration of 2 ppm). After stirring 48 h, a scandium(III) equilibrium concentration of 9.9 ppb was reached. The resulting distribution coefficient, *K*d, was calculated according to the equation:

(S4)

where *c*0 and *ce* represent the initial and equilibrium concentrations, respectively; *V* represents the volume of solution; and *m* equals the mass of MICOF-33, yielding a value of *K*d =2.01×106.

**3.V** **Selectivity studies.**Samples of MICOF-33 or NICOF-33 (10 mg) were added to Erlenmeyer flasks containing 100 mL aqueous solutions (pH ~ 3 adjusted by 0.1 M HCl), 20 ppm scandium(III) chloride hexahydrate, and 10 ppm each of KCl, NaCl, CoCl2, NiCl2, FeCl2, ZnCl2, CrCl3, MnCl2, CdCl2, CaCl2, MgCl2, FeCl3, LaCl3, and YCl3. After 120 min, 3 mL aliquots were removed from the solutions, filtered, and the filtrates were analyzed by ICP-MS.

**3.VI Sc3+ uptake from an environmental sample.** A sample of nickel ore from Jilin, China was dissolved in 100 mL of aqueous HCl (pH ~ 3) and determined by ICP-MS to contain the following metal ions: Sc3+ (4.6 ppm), Al3+ (3.4 ppm), Fe3+ (1.2 ppm), Ca2+ (222.1 ppm), Co2+ (18.4 ppm), Cu2+ (2.9 ppm), Mn2+ (7.1 ppm), Mg2+ (6.5 ppm), Ni2+ (3.5 ppm), Zn2+ (1.7 ppm), Na+ (2528.9 ppm), and K+ (29.1 ppm). MICOF-33 (10 mg) was added to this solution and the mixture was stirred for 120 min. The framework solid was then collected by filtration, dried under vacuum at 100 °C, and stirred in 8 mL of aqua regia for 4 h at 60 °C. The resulting solution was diluted by a factor of ~1000 and analyzed by ICP-MS. The final purity of the adsorbed scandium was 96.84% (balance of 2.55% Fe3+, 0.40% Al3+, and 0.21% Mn2+).

**4. Characterization data**


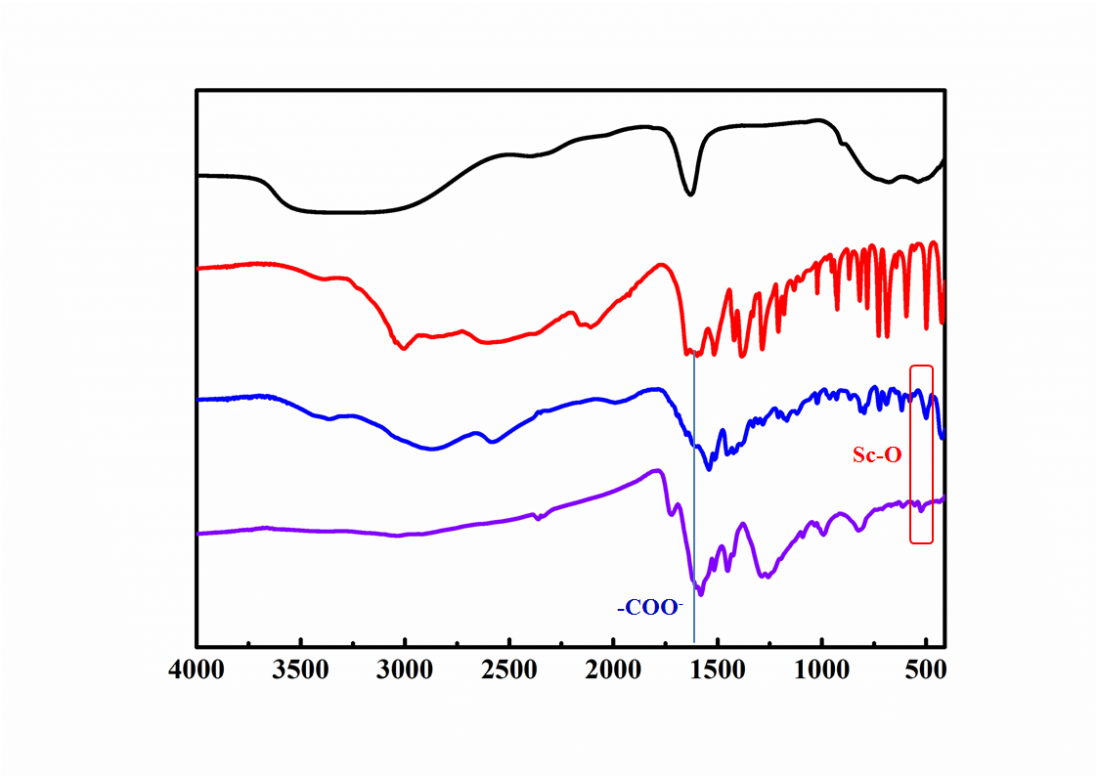


**Supplementary Figure 1.** FT-IR spectra of ScCl3·6H2O (black), 4-aminophenylacetic acid (red), Sc-complex (blue) and Sc–COF-33 (violet).





**Supplementary Figure 2.** XPS spectra (Sc2p) of Sc(O2CC11H23)3 (black), Sc-complex (red) and Sc–COF-33 (blue).


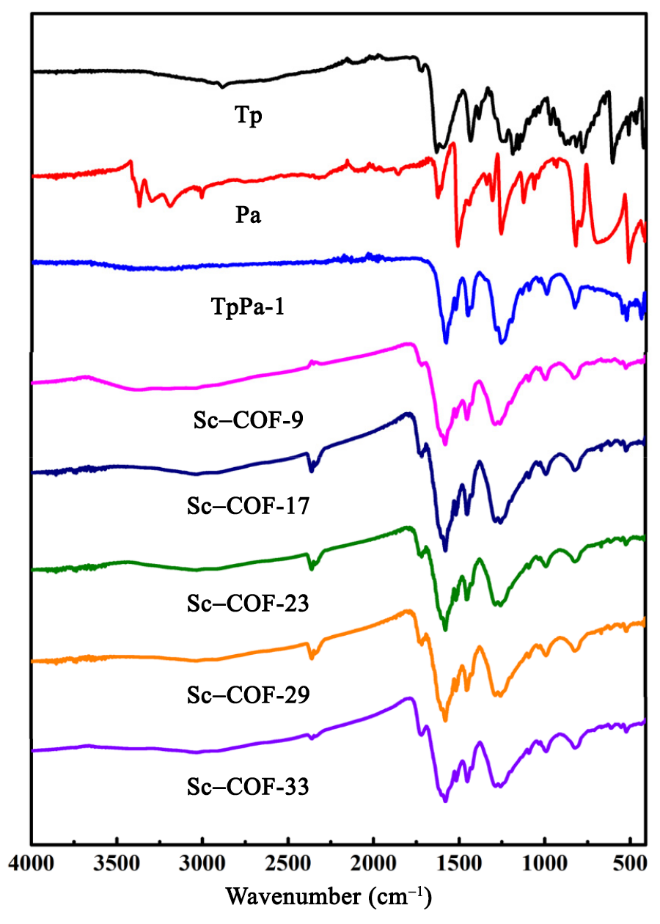


**Supplementary Figure 3.** FT-IR spectra of 1,3,5-triformylphloroglucinol (Tp), p-phenylenediamine (Pa), TpPa-1,1 and the Sc–COFs.


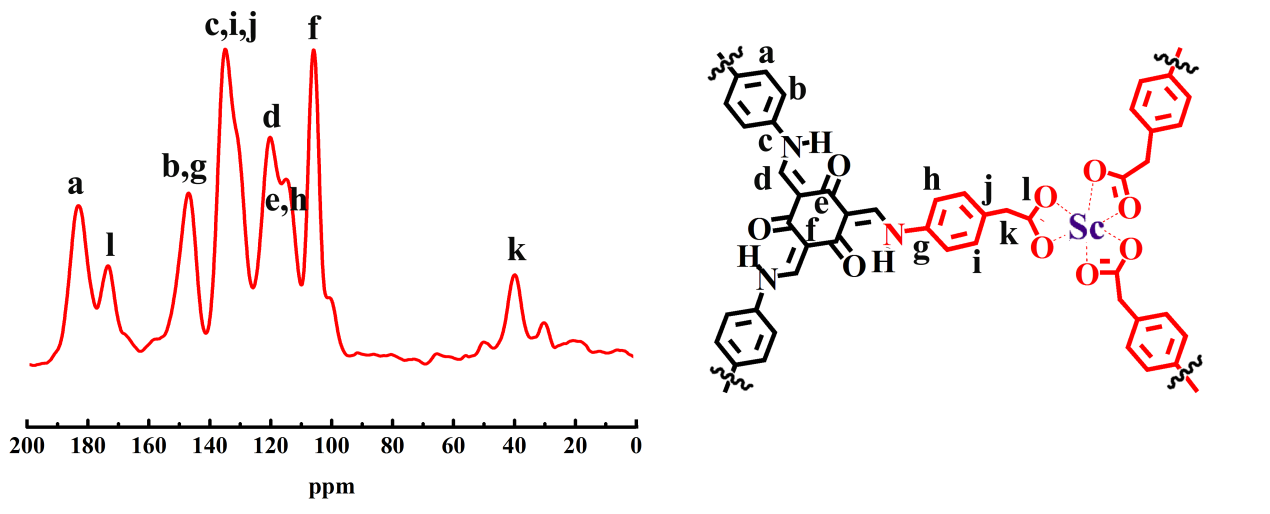


**Supplementary Figure 4.** Solid-state 13C CP/MAS NMR spectroscopy of Sc–COF-33 and assignments made based in part on literature data for the solid-state 13C NMR data for TpPa-1.1


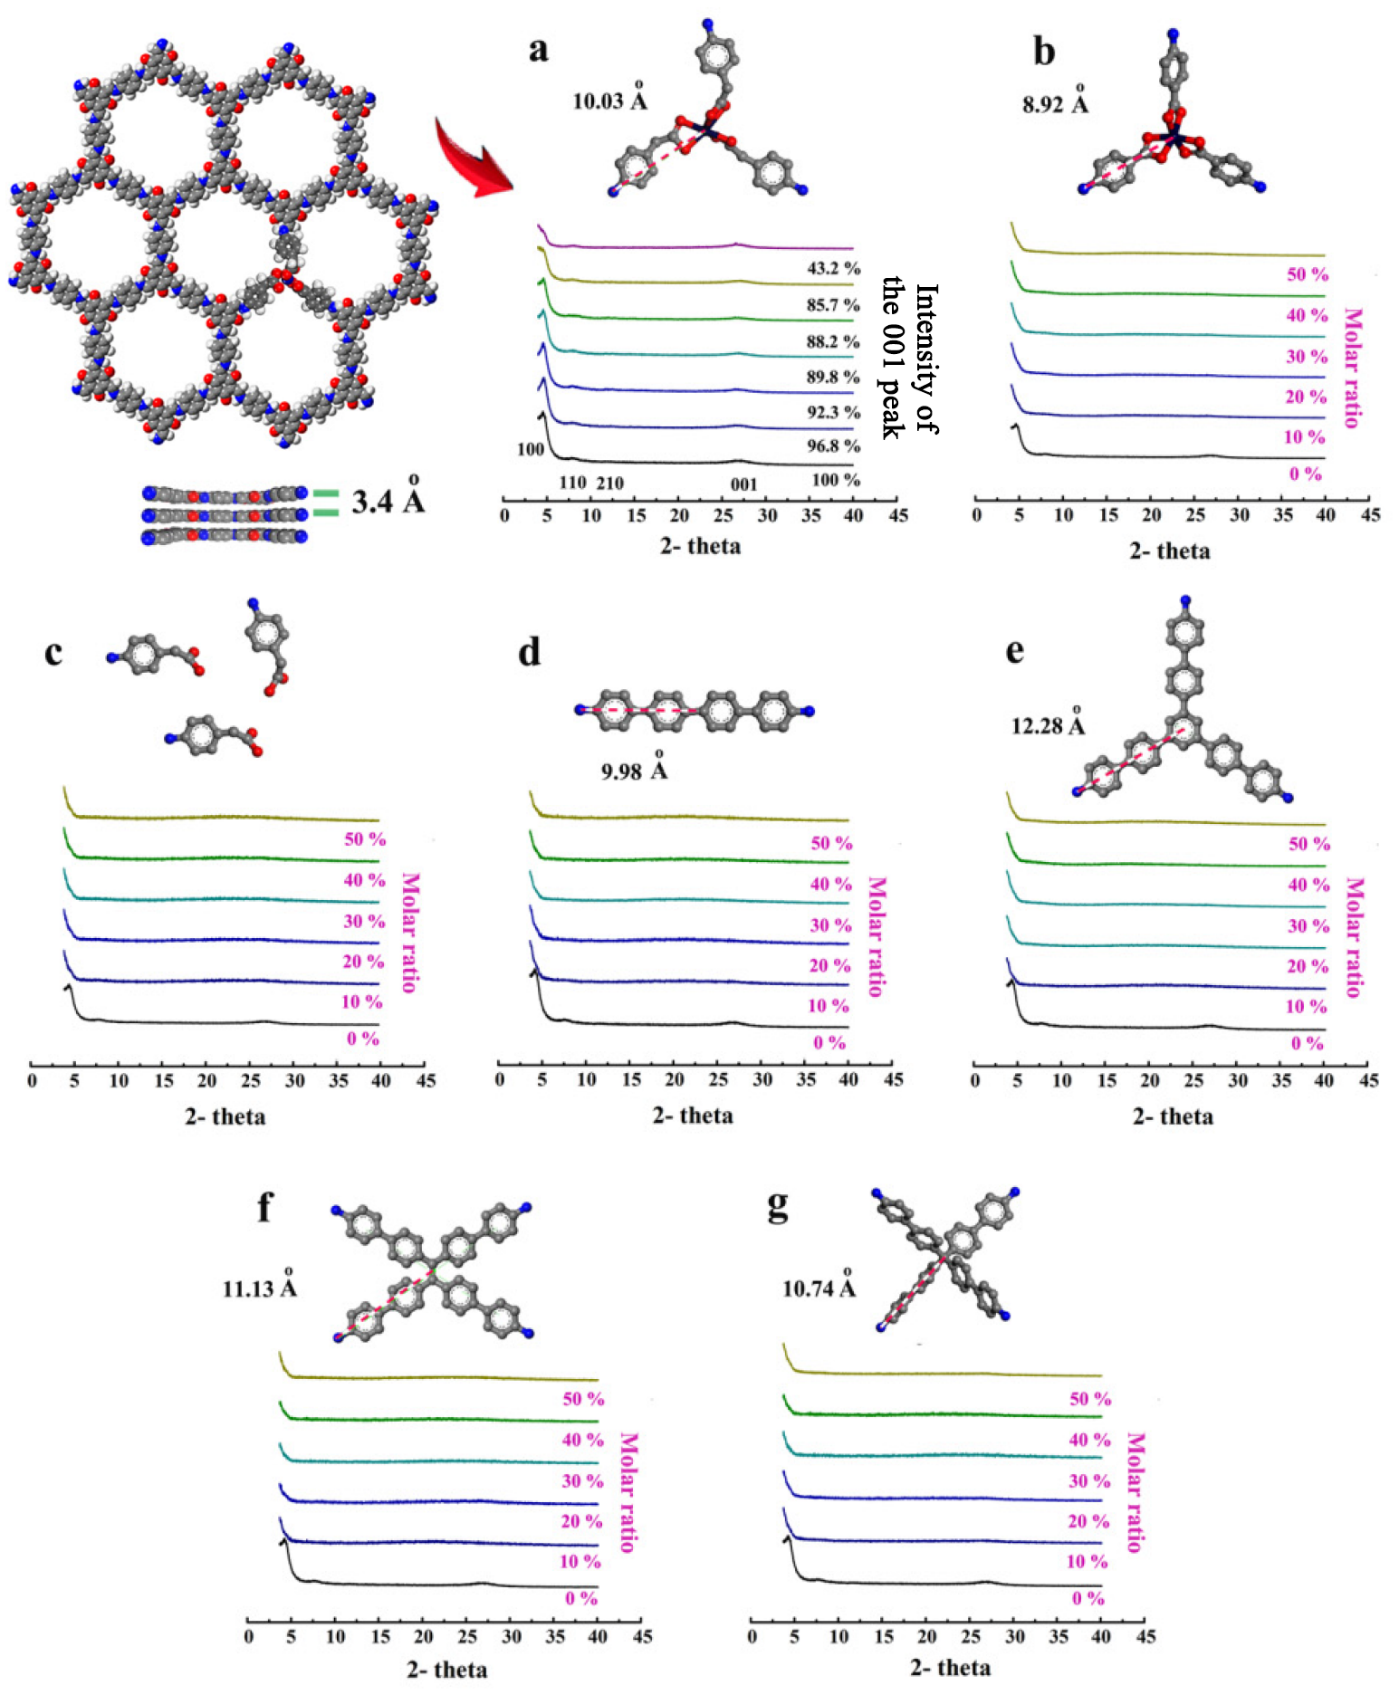


**Supplementary Figure 5.** Powder X-ray diffraction patterns of (a) TpPa-1 (black) and Sc–COF-9 to Sc–COF-43 (darkest blue to purple), illustrating the decrease in intensity of the 001 peak with increasing scandium content. (b–g) TpPa-1 derived structures using the following secondary building blocks: Sc3+ coordinated 4-aminobenzoic acid (b); organic units 4-aminophenylacetic acid (c); linear 4,4′′-diaminotetraphenyl (d); 1,3,5-tris(4-aminobiphenyl) benzene (e); 1,1,2,2-tetrakis(4-aminobiphenyl)ethene (f); and tetrakis(4-aminobiphenyl)-methane (g). Black to yellow patterns indicate increasing percent incorporation of the specified secondary building units. Even with only 10% incorporation, in all cases the resulting hybrid material is amorphous. The pink dashed line represents the distance from the center to the end of each molecule (given in Å).





**Supplementary Figure 6.** XPS spectrum (Sc2p) of Sc(C8H8NO2)3 (C8H8NO2− = 4-aminophenylacetate) after treatment with solvothermal conditions used in framework synthesis.


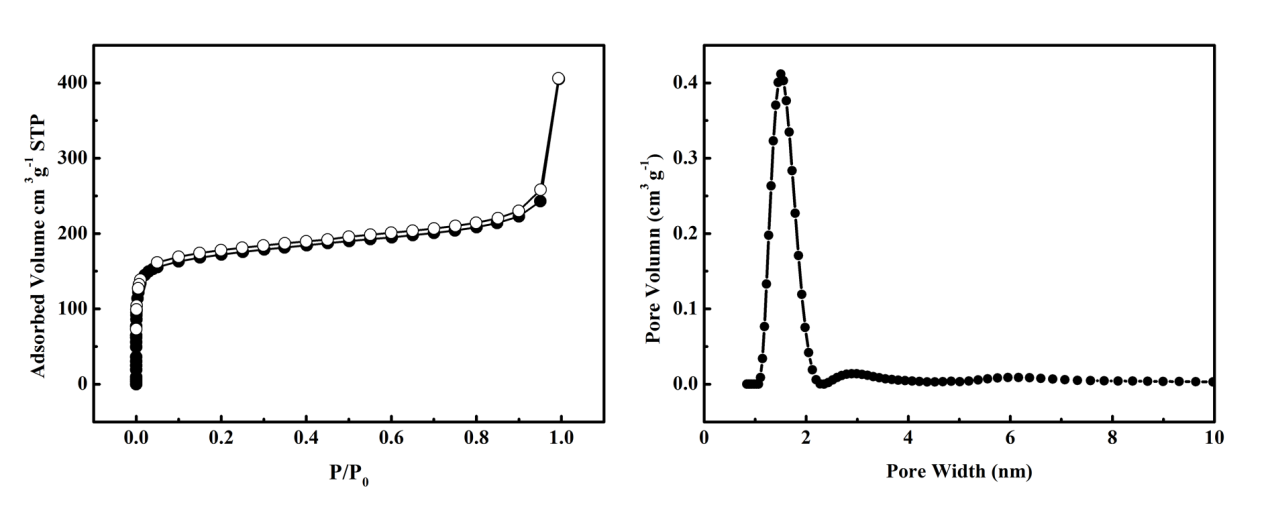


**Supplementary Figure 7.** Nitrogen adsorption isotherm and pore size distribution of TpPa-1.


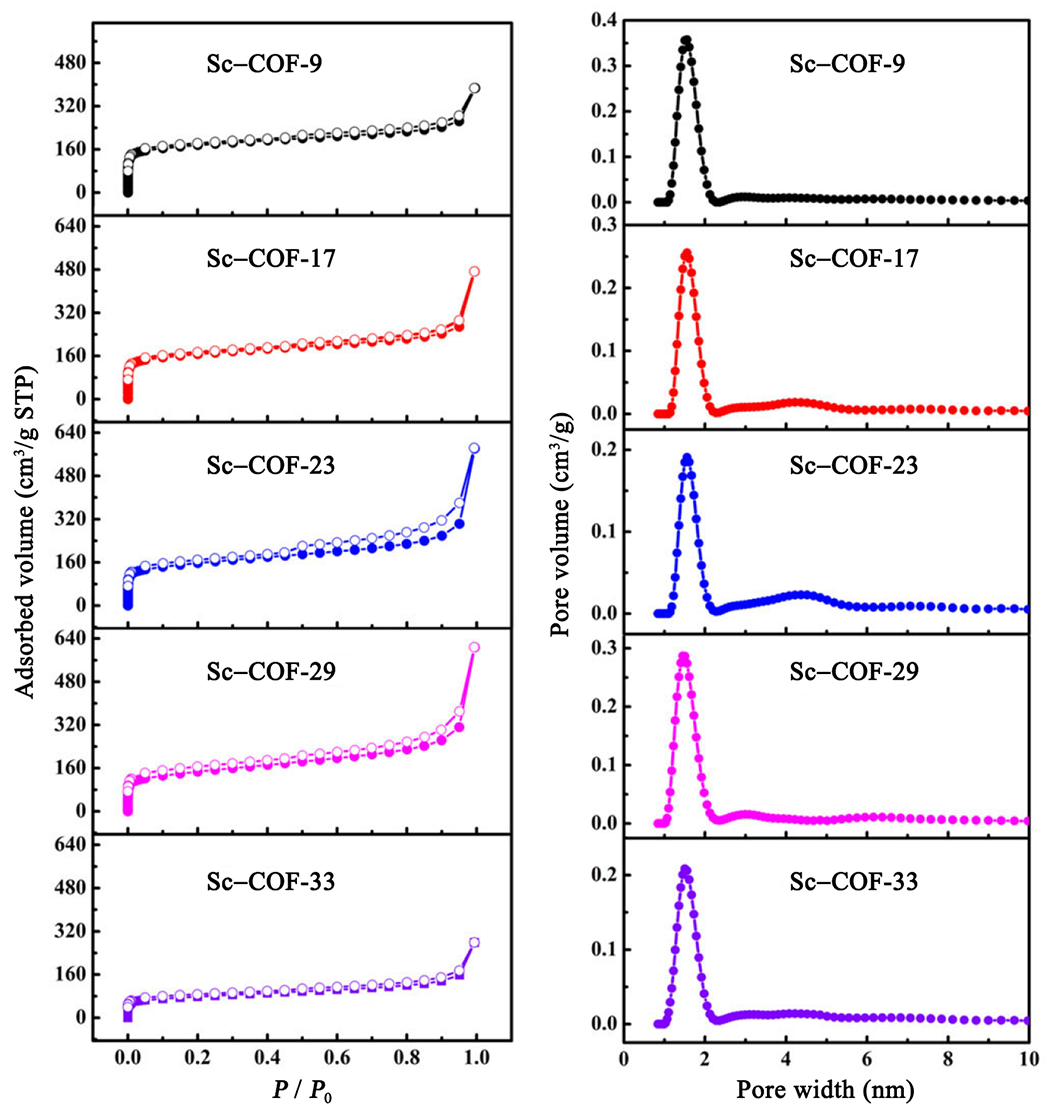


**Supplementary Figure 8.** Nitrogen adsorption isotherms and pore size distributions of the Sc–COFs.


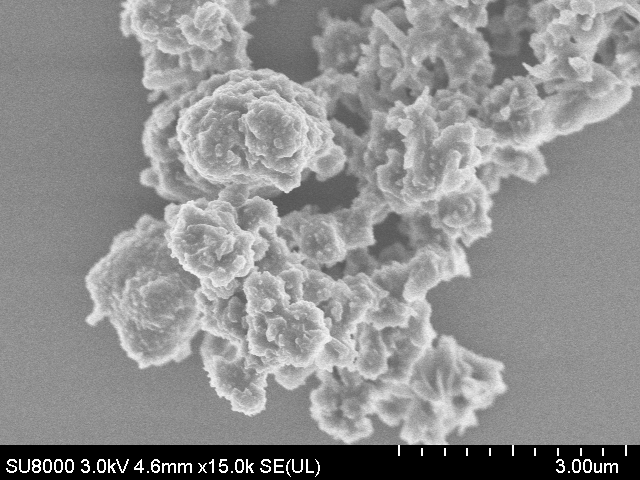


**Supplementary Figure 9.** SEM image of Sc–COF-33.





**Supplementary Figure 10.** Powder X-ray diffraction patterns of Sc–COF-33 (black), MICOF-33 (red), and MICOF-33 after adsorption of Sc3+ (blue).


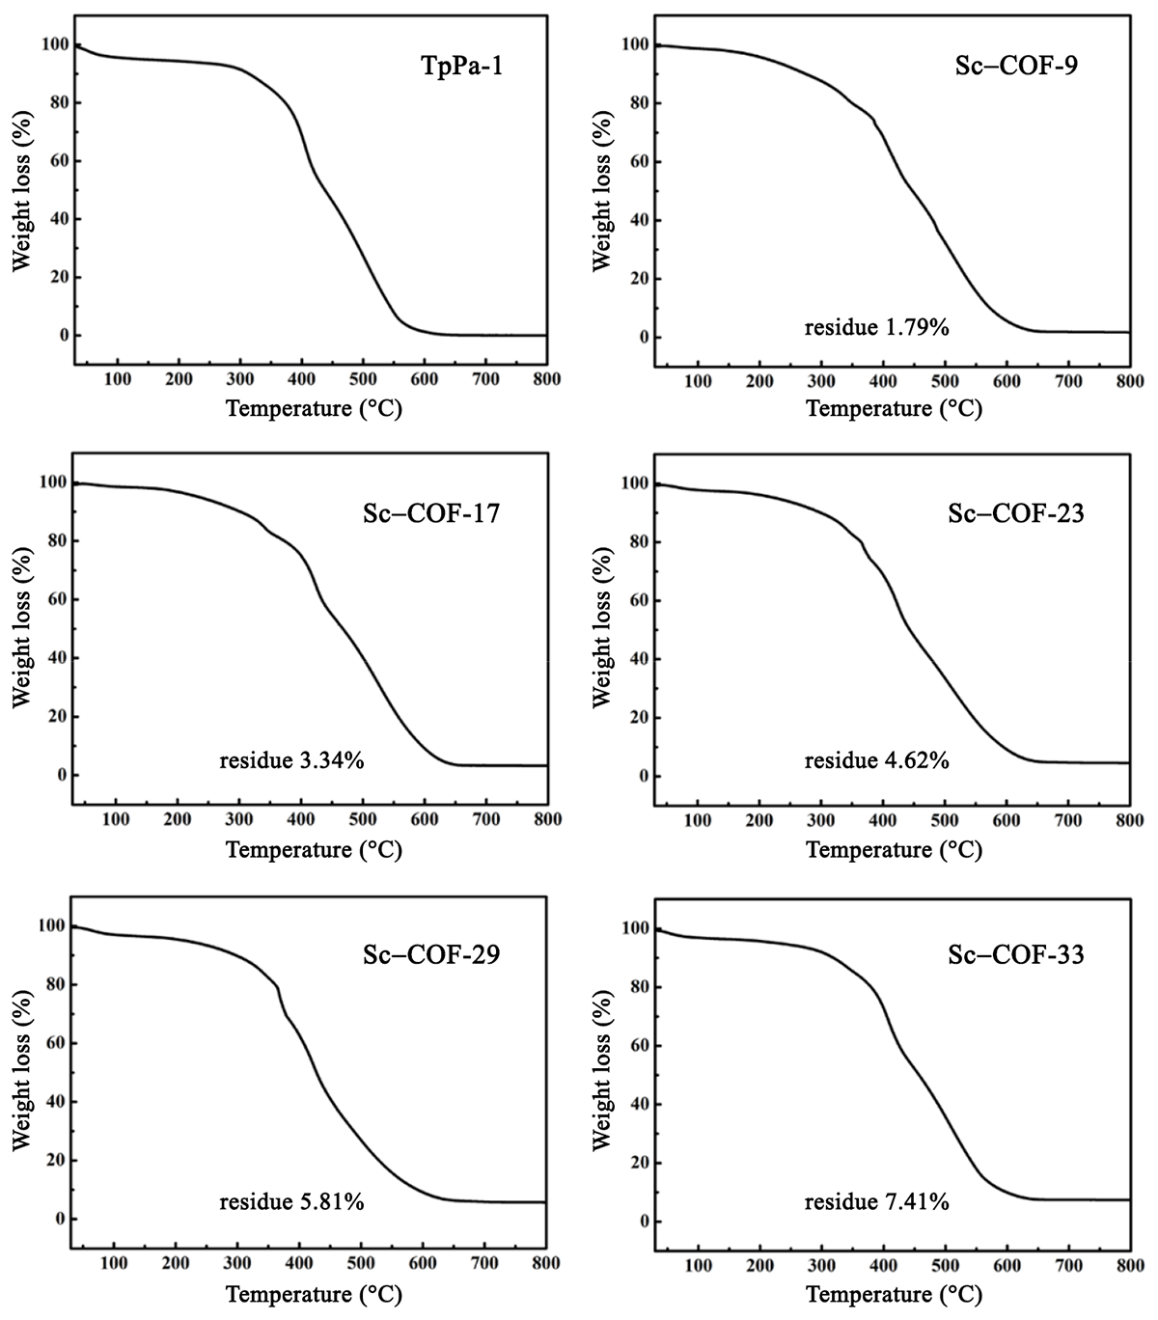


**Supplementary Figure 11.** Thermogravimetric analysis data for TpPa-1 and Sc–COFs.


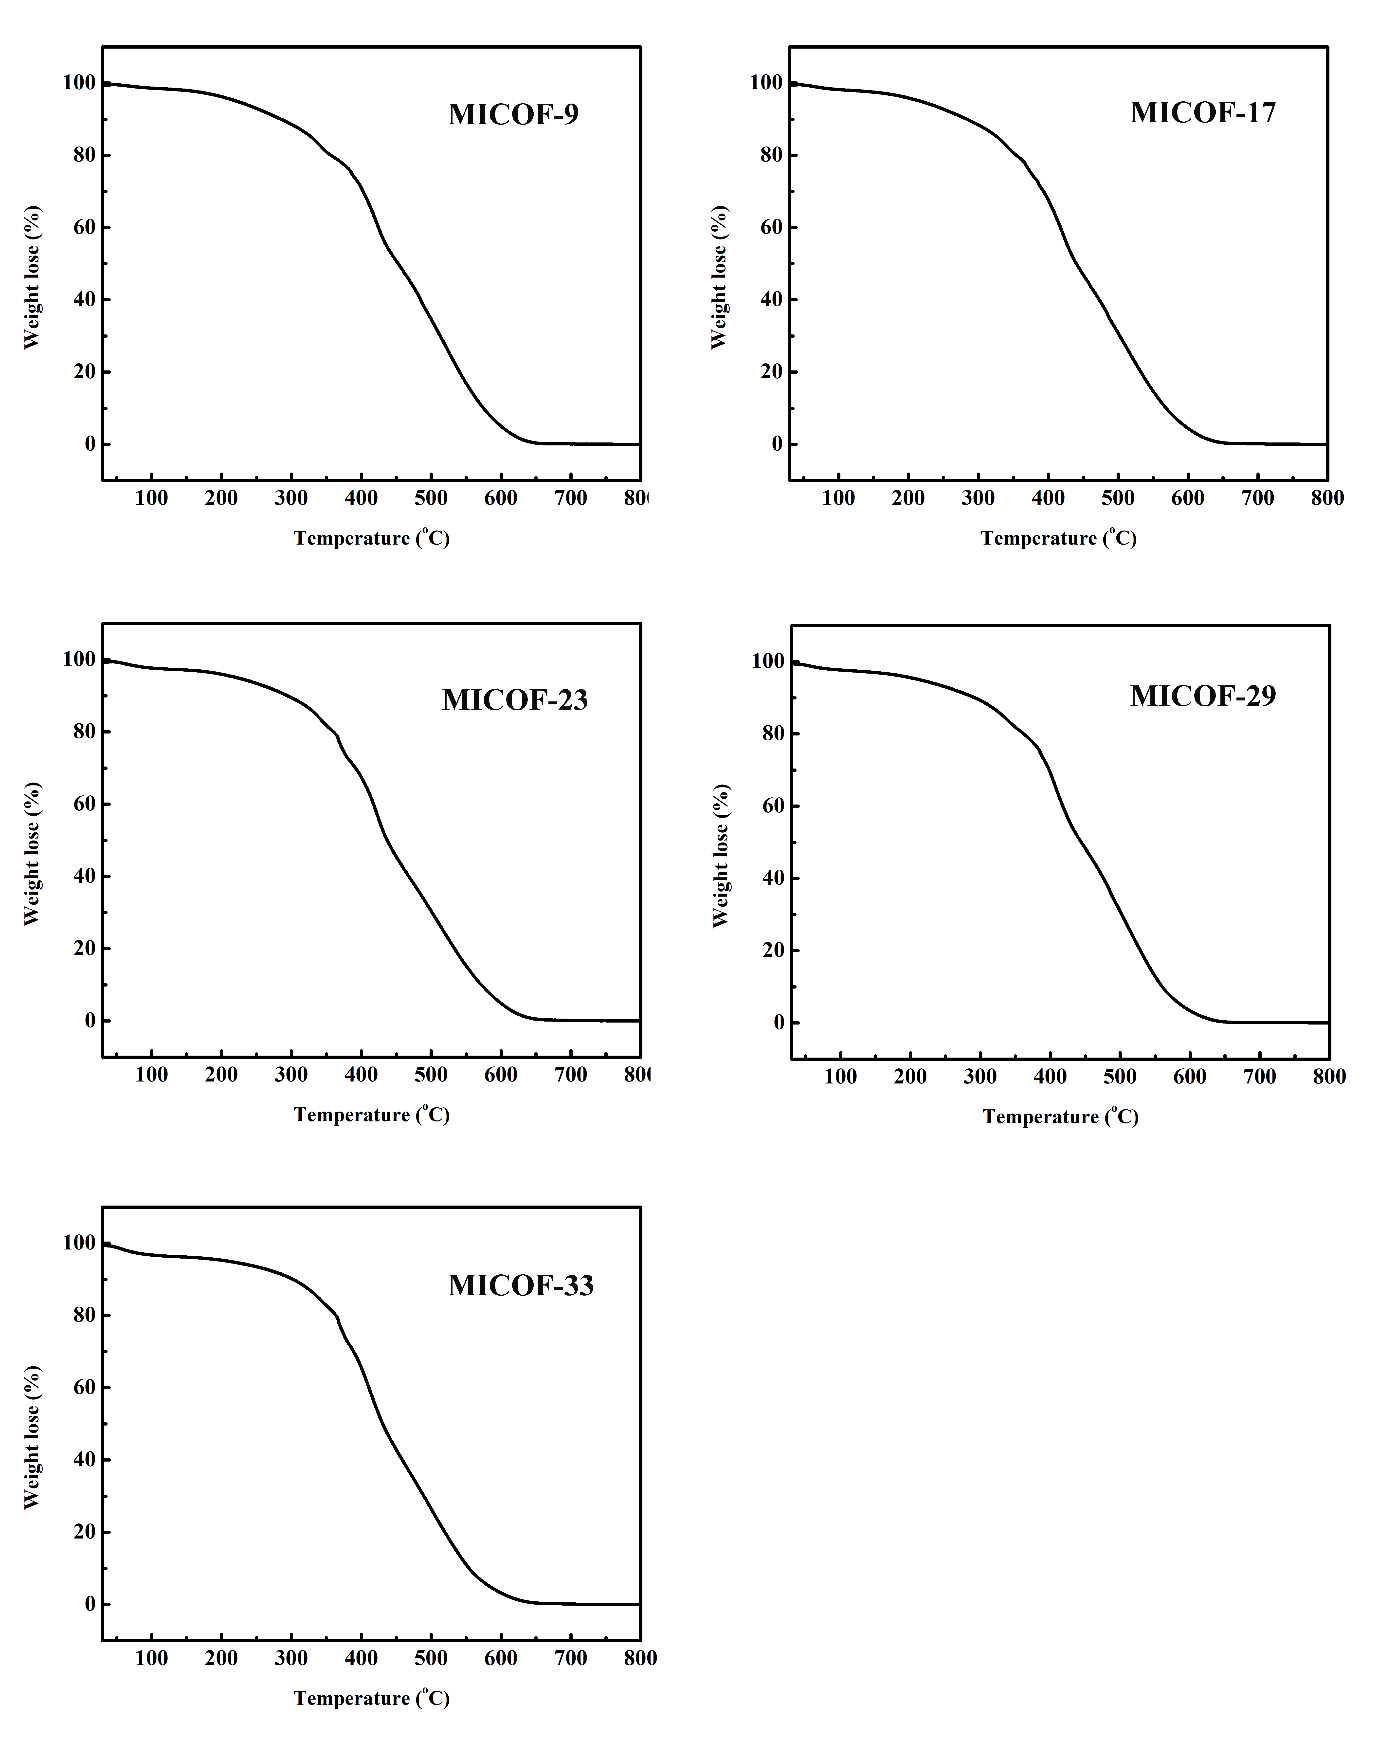
 **Supplementary Figure 12.** Thermogravimetric analysis data for TpPa-1 and MICOFs.





**Supplementary Figure 13.** XPS spectra (Sc2p) of the resultant MICOF-33 after absorbing Sc3+ ion.


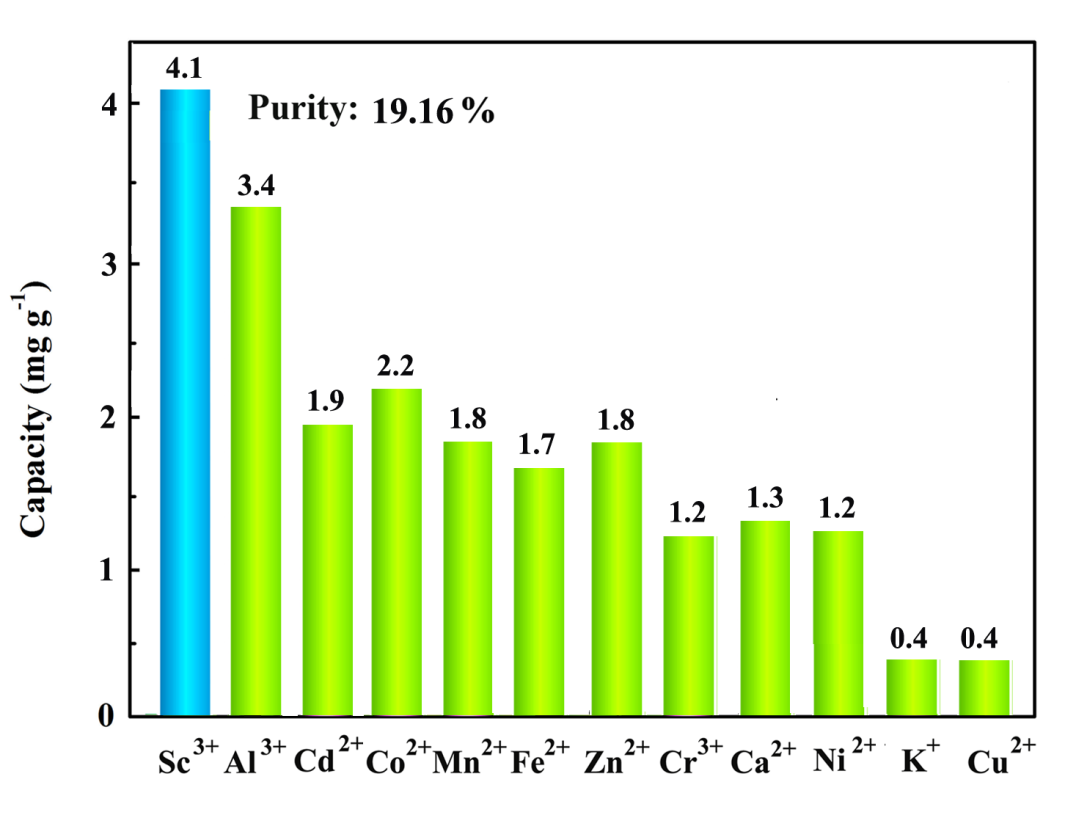


**Supplementary Figure 14.** Uptake capacities for Sc3+ and various competing metal ions using NICOF-33.





**Supplementary Figure 15.** Fit of the yttrium(III) uptake in MICOF-33 versus time data to a pseudo-second order model (qe = 6.6 mg/g, *k*2 = 0.013 g/(mg ∙ min), R2 = 0.998).





**Supplementary Figure 16.** Fit of the lanthanum(III) uptake in MICOF-33 versus time data to a pseudo-second order model (*q*e = 4.5 mg/g, *k*2 = 0.009 g/(mg ∙ min, R2 = 0.997).

**Supplementary Table 1.** Element analysis results for Sc–COFs and MICOF-33.

|  | **% C** | | **% H** | | **% N** | | **% O** | | **% Sc** | |
| --- | --- | --- | --- | --- | --- | --- | --- | --- | --- | --- |
|  | Theor. | Exp. | Theor. | Exp. | Theor. | Exp. | Theor. | Exp. | Theor. | Exp. |
| TpPa-1 | 67.9 | 67.6 | 3.7 | 3.0 | 13.2 | 13.0 | 15.2 | 15.3 | 0 | 0 |
| Sc–COF-9 | 66.6 | 67.3 | 3.7 | 3.8 | 12.0 | 11.3 | 16.4 | 16.3 | 1.3 | 1.5 |
| Sc–COF-17 | 65.5 | 66.7 | 3.7 | 3.6 | 10.9 | 11.1 | 17.5 | 18.4 | 2.4 | 2.4 |
| Sc–COF-23 | 64.6 | 66.0 | 3.7 | 3.9 | 10.0 | 9.0 | 18.3 | 18.8 | 3.4 | 3.5 |
| Sc–COF-29 | 63.8 | 65.1 | 3.7 | 4.0 | 9.3 | 8.2 | 19.1 | 19.5 | 4.1 | 4.2 |
| Sc–COF-33 | 63.1 | 64.2 | 3.7 | 3.7 | 8.6 | 9.0 | 19.8 | 21.0 | 4.8 | 5.1 |
| MICOF-33 | 66.3 | 65.0 | 3.9 | 3.9 | 9.0 | 9.9 | 20.8 | 21.1 | 0.0 | 0.1 |

**Supplementary Table 2.** Equilibrium Sc3+ ion uptake in MICOF-33.

| **Sc3+ concentration (ppm)** | **Equilibrium uptake (mg/g)** |
| --- | --- |
| 2 | 15.0 |
| 5 | 20.1 |
| 10 | 31.0 |
| 15 | 40.9 |
| 20 | 48.7 |
| 50 | 52.0 |
| 100 | 54.1 |
| 200 | 56.2 |
| 300 | 57.2 |
| 500 | 58.5 |

**Supplementary Table 3.** Time-dependent Sc3+ ion uptake in MICOF-33 (initial scandium(III) concentration = 20 ppm; final concentration = 15.14 ppm) as presented in Fig. 3b of the main text.

| **Time (min)** | **Uptake (mg/g)** |
| --- | --- |
| 0 | 0 |
| 1 | 9.8 |
| 2 | 23.9 |
| 3 | 34.7 |
| 5 | 42.0 |
| 10 | 45.7 |
| 30 | 47.5 |
| 60 | 48.1 |
| 90 | 48.3 |
| 120 | 48.4 |
| 180 | 48.6 |

**Supplementary Table 4.** Time-dependent Sc3+ ion uptake in MICOF-33 as a function of HCl concentration (initial scandium concentration = 20 ppm).

| **Time (min)** | **Uptake (mg/g)** | | | | |
| --- | --- | --- | --- | --- | --- |
| **0.1 M** | **1 M** | **3 M** | **6 M** | **10 M** |
| 0 | 0 | 0 | 0 | 0 | 0 |
| 5 | 8.0 | 2.5 | 2.1 | 1.9 | 1.5 |
| 10 | 10.5 | 3.4 | 2.9 | 2.4 | 2.0 |
| 30 | 16.7 | 5.5 | 4.5 | 4.1 | 3.5 |
| 60 | 23.1 | 8.0 | 6.9 | 5.9 | 4.5 |
| 90 | 26.9 | 9.5 | 8.0 | 6.5 | 5.5 |
| 120 | 28.9 | 10.5 | 8.9 | 7.0 | 5.8 |
| 180 | 29.2 | 11.5 | 9.8 | 7.2 | 6.0 |

**Supplementary Table 5.** Scandium(III) saturation capacities (in mg/g) and Sc3+/La3+ selectivities for MICOF-33 and literature scandium(III) capture materials (all data reported at room temperature). The selectivity values are plotted in Fig. 4b of the main text.

| **Adsorbent** | **Reference** | **Entry in Fig. 4b** | **pH** | **Sc3+ capacity** | **Sc3+/La3+ selectivity** |
| --- | --- | --- | --- | --- | --- |
| MICOF-33 | This work | MICOF-33 | 5.5 | 58.9 | **390** |
| silica-PAN | 5 | 11 | 5.0 | 42.41 | 94 |
| SG-MTPB a | 7 | 9 | 3.0 | 27 | ~ 24.6 |
| silica gel | 10 | 4 | 3.0 | 3.89 | ~ 9 |
| silica material (SBA-15) | 10 | 3 | 3.0 | 2.59 | ~ 9 |
| mesoporous silica material (KIT-6) | 10 | 2 | 3.0 | 1.03 | ~ 9 |
| APTESb silica-chitosan-PAN | 2 | 15 | 4.0 | 175.22 | ~ 7.2 |
| Cellulose-silica nanocomposite | 9 | 7 | 6.0 | 23.76 | ~ 3.71 |
| MIL-101 | 4 | 13 | 4.5 | 90.21 | ~ 2.31 |
| KMnO4AC | 11 | 1 | 3.0 | 0.12 | ~ 1.71 |
| Ga-nanosilicac | 3 | 5 | 6.0 | 11.05 | ~ 1.4 |
| PAN-APTES nanosilica d | 3 | 12 | 4.0 | 75.5 | ~ 1.22 |
| MWNT-sil-P e | 6 | 10 | 4.0 | 32.92 | ~ 1.18 |
| PAN Activated carbon-APTES nanosilica | 3 | 14 | 4.0 | 112.74 | ~ 1.09 |
| Acac modified silica gel | 8 | 8 | 6.0 | 25.65 | ~ 1.02 |
| SWNT-sil-P f | 6 | 6 | 4.0 | 12.68 | ~ 0.41 |

a 4-(2-morinyldiazenyl)-N-(3-(trimethylsilyl)propyl)benzamide

b 3-Aminopropyl triethoxy silane

c Gum arabic grafted polyacrylamide based silica nanocomposite

d PAN = 1-(2-pyridylazo)-2-naphthol

e MWNT = multiwalled carbon nanotube

f SWNT = single-walled carbon nanotube

**Supplementary Table 6.** Sc3+ saturation capacities (mg/g) and Sc3+/Fe3+ selectivities for MICOF-33 and reported Sc3+ capture materials (all data reported at room temperature).

| **Adsorbent** | **Reference** | **pH** | **Sc3+ capacity** | **Sc3+/Fe3+ selectivity** |
| --- | --- | --- | --- | --- |
| MICOF-33 | This work | 5.5 | 58.9 | **42** |
| EGTA–chitosan–silicaa | 12 | 2.0 | 6.3 | ~ 3.6 |
| silica gel | 10 | 3.0 | 3.89 | ~ 1.15 |
| mesoporous silica material (KIT-6) | 10 | 3.0 | 1.03 | ~ 1 |
| Extractant-impregnated resins | 13 | 3.0 | 48 | ~ 1 |
| DTPA–chitosan–silicab | 12 | 2.0 | 8.1 | ~ 1 |
| silica material (SBA-15) | 10 | 3.0 | 2.59 | ~ 0.95 |

aEGTA = ethyleneglycol tetraacetic acid

bDTPA = diethylenetriamine pentaacetic acid

**5. DFT calculations**

Computations were performed using Gaussian 16 code14 with B3LYP/ LANL2DZ+empirical dispersion correction GD315. Supplementary Fig. 17 shows the optimized parent TpPa molecular unit, with selected bond lengths highlighted. Our calculations predict a CB–N bond that is 0.8% longer than predicted in ref. 13 (average CB–N = 1.332 Å), while all other distances differ by only 0.3%.


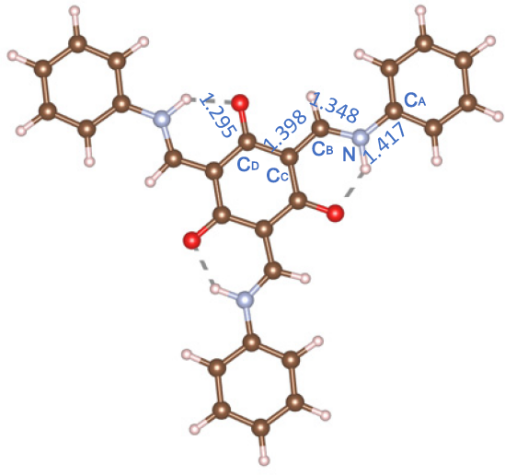


**Supplementary Figure 17.** Optimized structure of the model truncated TpPa-1 molecular unit as calculated in this work; brown, red, cyan, and white spheres represent C, O, N, and H atoms, respectively. Select calculated bond lengths (in Å) are shown in blue. Angles: CA–N–CB = 127.53°; CC–CB–N = 123.90°; CD–CC–CB = 121.46°.

We performed calculations on a model metal complex featuring three phenylacetate ligands. To differentiate the +3, +2 and +1 valence state of various metal ions, different initial MO*x* bonding configurations were generated for optimzation, i.e., MO6 for M3+ and MO4 for M2+; MO6 was adopted as a starting configuration for M+.Benzene rings were fixed at the positions obtained from the previous TpPa-1 molecule optimization, since it is expected that their positions are largely fixed by their neighbors in the framework structure. Other atoms were allowed to move freely during optimization. In addition to the LANL2DZ basis set, we used the def2qzvp basis set on Sc3+ and Y3+ to verify the reliability of the LANL2DZ predictions on metal–oxygen bonding configurations and order of bonding strength; def2qzvp contains polarization functions and thus is more accurate16. The optimized computational results are shown in Supplementary Table 7. The results from the LANL2DZ basis set match well with the def2qzvp basis set. With the exception of Al3+ and K+, all ions occupy a MO6 coordination environment akin to Sc3+. Our calculations predict that a MO3 bonding motif is most stable for Al3+, where one oxygen from each ligand is coordinated. Calculations with Na+ and K+ did not yield stable structures.


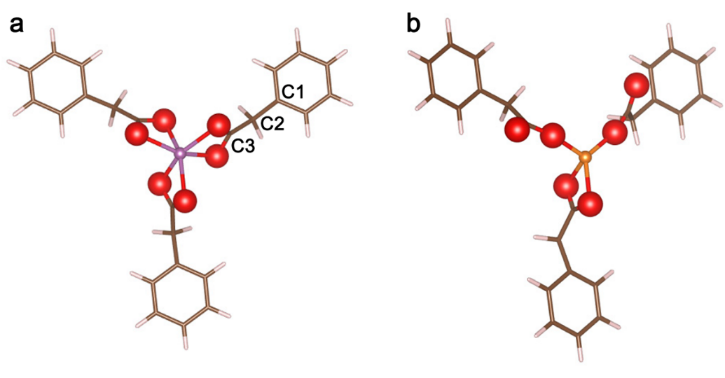


**Supplementary Figure 18.** Computed structures for M3+ in an MO6 coordination environment (a) and M2+ in an MO4 coordination environment (b). Brown, red, purple, gold, and white spheres represent C, O, M3+, M2+, and H atoms (or ions), respectively.

**Supplementary Table 7.** Optimized average M–O bond lengths and standard deviations, C1–C2–C3 angles, and M–phenylacetate bond energies (BEM–PAA, kJ/mol) for Sc3+ and competing metal ions. Value in parentheses are results from the def2qzvp basis set.

| **Metal** | **Avg M–O (Å)** | **Std** | **C1–C2–C3 (°)** | **BEM–PAA **** |
| --- | --- | --- | --- | --- |
| Sc3+ | 2.18 (2.18) | 0.10 (0.09) | 128.5 (130.2) | 1.39 (1.36) × 103 |
| La3+ | 2.52 | 0.07 | 123.7 | 1.43 × 103 |
| Y3+ | 2.34 (2.32) | 0.07 (0.07) | 126.0 (127.7) | 1.46 (1.39) × 103 |
| Fe3+ * | 2.03 | 0.11 | 131.2 | 1.01× 103 |
| Cr3+ * | 2.04 | 0.10 | 131.5 | 1.07× 103 |
| Al3+ | 1.93 | – | 131.6 | 1.07× 103 |
| Co2+ * | 2.01 | 0.12 | 118.8 | 0.86× 103 |
| Mn2+ * | 1.89 | 0.12 | 121.2 | 1.21× 103 |
| Fe2+ | 1.90 | 0.16 | 120.1 | 1.00× 103 |
| Zn2+ | 2.03 | 0.10 | 118.7 | 0.63× 103 |
| Mg2+ | 1.98 | 0.10 | 118.5 | 0.90× 103 |
| Cd2+ | 2.22 | 0.08 | 116.9 | 0.54× 103 |
| Ni2+ | 2.0 | 0.07 | 119.3 | 0.72× 103 |

* Indicates metal ion is high-spin.

** BEM–PAA = (3∙EPAA + EM) − Etot, where EPAA is the energy of a single optimized phenylacetic acid molecule (with benzene ring fixed), EM is the electrostatic energy of single metal, and Etot is the total energy of the whole compound.


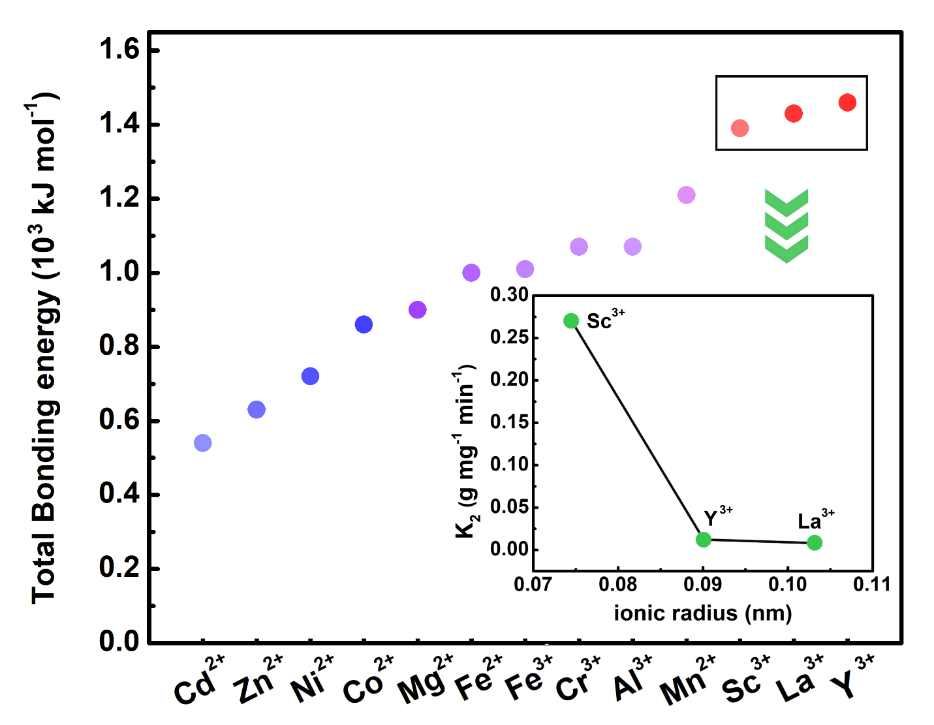


**Supplementary Figure 19.** Calculated M–phenylacetate bond energies for various metal ions coordinated by three 4-aminophenylacetate ions. Inset: Rate constants (*k*2) determined from fitting time-dependent uptake data for Sc3+, La3+, and Y3+ in MICOF-33 to a pseudo-second order model (see Supplementary Figs. 15, 16 and Table 8).

**6. Yttrium(III) and lanthanum(III) uptake in MICOF-33**

In an Erlenmeyer flask, a 20 ppm solution of Ln3+ (Ln = Y or La) was prepared by dissolving LnCl3 in 100 mL aqueous solution containing HCl (pH ~ 5.5). The solution was stirred with 10 mg of MICOF-33, and at set time intervals, 3 mL aliquots were removed from the mixture, filtered, and the filtrate was analyzed by ICP-MS to determine the Ln3+ concentration. After 180 min, the resulting uptake data (Supplementary Figs. 15, 16 and Table 8) were fit using a pseudo-second order kinetic model.

**Supplementary Table 8.** Time-dependent Ln3+ ion uptake in MICOF-33 (initial / final Y3+ concentration = 20 / 19.4 ppm; initial / final La3+ concentration = 19.61 / 15.14 ppm).

| **Time (min)** | **Y3+ uptake (mg/g)** | **La3+ uptake (mg/g)** |
| --- | --- | --- |
| 0 | 0 | 0 |
| 1 | 0.5 | 0.19 |
| 2 | 0.8 | 0.35 |
| 3 | 1.1 | 0.5 |
| 5 | 1.6 | 0.8 |
| 10 | 2.9 | 1.3 |
| 30 | 4.3 | 2.4 |
| 60 | 5.6 | 3.2 |
| 90 | 5.9 | 3.72 |
| 120 | 6.0 | 3.9 |
| 180 | 6.0 | 3.9 |

**7. Preparation of MICOF-33 using earth-abundant template metal ions**

**Preparation of Ni2+, Mg2+, and Zn2+ complexes with 4-aminophenylacetate.** NiCl2 (13.0 mg, 0.100 mmol), MgCl2 (9.5 mg, 0.10 mmol), or ZnCl2 (13.6 mg, 0.998 mmol) and 4-aminophenylacetic acid (45.3 mg, 0.300 mmol) were dissolved in a 4:1 (v/v) mixture of *N*,*N*-dimethylformamide and water (0.2 mL) and stirred for 3 h at room temperature. After that time, the solvent was removed from the mixtures under vacuum to obtain the corresponding Ni-complex, Mg-complex, and Zn-complex. Purity was confirmed by elemental analysis (see Supplementary Table 9).

**Preparation of** **Ni–COF-33, Mg–COF-33 or Zn–COF-33 and corresponding MICOF-33 materials.** Triformylphloroglucinol (0.120 mmol), paraphenylenediamine (0.090 mmol), and each metal complex (0.060 mmol) were combined in pyrex tubes with mesitylene (0.6 mL), dioxane (0.6 mL), and acetic acid (0.2 mL, 3 M). The pyrex tubes were sonicated to make the mixture homogeneous, flash frozen at 77 K, and degassed over three freeze–pump–thaw cycles. Finally, the pyrex tubes were heated at 120 °C for 72 hours. After cooling to room temperature, the resulting precipitate was filtered, washed with *N*,*N*-dimethylacetamide and acetone three times, and dried under vacuum at 100 °C to obtain Ni**–**COF-33, Mg**–**COF-33, and Zn**–**COF-33, respectively. The same washing method as described for the Sc**–**COFs (see Methods) was used to remove the template ions to generate metal-imprinted COF-33 networks MICOF-33a (from Ni2+), MICOF-33b (from Mg2+), and MICOF-33c (from Zn2+). Elemental analysis (Supplementary Table 9) and powder X-ray diffraction data (Supplementary Fig. 20) confirmed the crystallinity and purity of the resulting frameworks.





**Supplementary Figure 20.** Powder X-ray diffraction patterns for Ni-COF-33 (black), Mg-COF-33 (red) and Zn-COF-33 (blue).

**Sc3+ ion and template ion (Ni2+, Mg2+ or Zn2+) adsorption experiments.** MICOF-33 samples (10 mg of MICOF-33a, MICOF-33b, or MICOF-33c) prepared from each template ion were added to 100 mL aqueous HCl solutions containing 20 ppm Sc3+ and 10 ppm M2+ (M = Ni, Mg, or Zn, respectively; pH ~ 3). The mixtures were stirred for 180 min and then the resulting solutions were analyzed by ICP-MS. As seen in Supplementary Table 9, MICOF-33 samples prepared with other template ions are also highly selective for Sc3+ ion against the corresponding template ion. The corresponding selectivity coefficients (mass ratios) are consistent with those determined for the same metal ion pairs adsorbed in MICOF-33 prepared using Sc3+ as a template ion (6.68×103 for Sc3+/Ni2+, 2.26×103 for Sc3+/Mg2+, and 1.02×103 for Sc3+/Zn2+).

**Supplementary Table 9.** Elemental analysis results for Ni2+, Mg2+, and Zn2+ complexes with 4-aminophenylacetate, Ni–COF-33, Mg–COF-33, Zn–COF-33, and corresponding MICOF-33 materials.

|  | **% C** | | **% H** | | **% N** | | **% O** | | **% Metal** | |
| --- | --- | --- | --- | --- | --- | --- | --- | --- | --- | --- |
|  | Theor. | Exp. | Theor. | Exp. | Theor. | Exp. | Theor. | Exp. | Theor. | Exp. |
| Ni-complex | 56.6 | 56.4 | 4.7 | 4.6 | 8.2 | 8.4 | 18.9 | 18.9 | 11.6 (Ni) | 11.7 (Ni) |
| Mg-complex | 60.7 | 61.1 | 5.1 | 5.0 | 8.9 | 8.8 | 20.2 | 20.0 | 5.1 (Mg) | 5.1 (Mg) |
| Zn-complex | 55.9 | 55.2 | 4.7 | 5.1 | 8.1 | 8.5 | 18.6 | 18.6 | 12.7 (Zn) | 12.6 (Zn) |
| Ni-COF-33 | 62.3 | 63.1 | 3.7 | 3.3 | 8.5 | 8.4 | 19.5 | 19.4 | 6.0 (Ni) | 5.8 (Ni) |
| Mg-COF-33 | 64.5 | 64.0 | 3.8 | 4.0 | 8.9 | 9.0 | 20.2 | 20.3 | 2.6 (Mg) | 2.7 (Mg) |
| Zn-COF-33 | 61.9 | 61.9 | 3.6 | 3.6 | 8.5 | 8.6 | 19.4 | 19.3 | 6.6 (Zn) | 6.6 (Zn) |
| MICOF-33-1 | 66.3 | 66.6 | 3.9 | 3.6 | 9.0 | 8.7 | 20.8 | 21.0 | 0.0 | 0.1 (Ni) |
| MICOF-33-2 | 66.3 | 66.2 | 3.9 | 4.0 | 9.0 | 9.0 | 20.8 | 20.8 | 0.0 | 0 |
| MICOF-33-3 | 66.3 | 66.9 | 3.9 | 3.6 | 9.0 | 8.8 | 20.8 | 20.7 | 0.0 | 0 |

**Supplementary Table 10.** Uptake of Sc3+ and earth-abundant metal ions Ni2+, Mg2+, or Zn2+ (in mg/g) in MICOF-33 samples prepared starting from Ni2+, Mg2+, or Zn2+ as a template ion. Uptake values are reported after 180 min (298 K, pH ~ 3). Calculated selectivities for Sc3+ over each template ion are also given.

| **Sample** | **Template M2+** | **Sc3+ uptake** | **M2+ uptake** | **Sc3+/M2+ selectivity** |
| --- | --- | --- | --- | --- |
| MICOF-33 | Ni2+ | 33.9 | 0.01 | 3.39×103 |
| MICOF-33 | Mg2+ | 31.7 | 0.02 | 1.59×103 |
| MICOF-33 | Zn2+ | 37.8 | 0.04 | 9.5×102 |

**8. References**

1. Kandambeth, S. et al. Construction of crystalline 2D covalent organic frameworks with remarkable chemical (acid/base) stability via a combined reversible and irreversible route. *J. Am. Chem. Soc.* **134**, 19524–19527 (2012).

2. Ramasamy, D. et al. Ligand immobilized novel hybrid adsorbents for rare earth elements (REE) removal from waste water: Assessing the feasibility of using APTES functionalized silica in the hybridization process with chitosan. *Chem. Eng. J.* **330**, 1370–1379 (2017).

3. Ramasamy, D. Puhakka, V. Repo, E. Hammouda, S & Sillanpää, M. Two-stage selective recovery process of scandium from the group of rare earth elements in aqueous systems using activated carbon and silica composites: Dual applications by tailoring the ligand grafting approach. *Chem. Eng. J.* **341**, 351–360 (2018).4. Lou, Z. et al. Acrylic Acid-Functionalized Metal−Organic Frameworks for Sc(III) selective adsorption. *ACS Appl. Mater. Interfaces*. **11**, 11772−11781 (2019).

5. Ramasamy, D. Puhakka, V. Repo, E. Khan, S. & Sillanpää, M. Coordination and silica surface chemistry of lanthanides (III), scandium (III) and yttrium (III) sorption on 1-(2-pyridylazo)-2-napththol (PAN) and acetylacetone (acac) immobilized gels. *Chem. Eng. J.* **324**, 104–112 (2017).

6. Ramasamy, D. L., Puhakka, V., Doshi, B., Iftekhar, S. & Sillanpää, M. Fabrication of carbon nanotubes reinforced silica composites with improved rare earth elements adsorption performance. *Chem. Eng. J.* **365**, 291–304 (2019).

7. Zhang, L. et al. Selective solid phase extraction of trace Sc(III) from environmental samples using silica gel modified with 4-(2-morinyldiazenyl)-N-(3-(trimethylsilyl)propyl)benzamide. *Anal. Chim. Acta*. **629**, 84–91 (2008).

8. Zhang, N. Huang, C. & Hu B. ICP-AES Determination of trace rare earth elements in environmental and food samples by on-line separation and preconcentration with acetylacetone-modified silica gel using microcolumn. *Anal. Sci.* **23**, 997–1002 (2007).

9. Iftekhar, S. Srivastava, V. & Sillanpää, M. Enrichment of lanthanides in aqueous system by cellulose based silica nanocomposite. *Chem. Eng. J.* **320**, 151–159 (2017).

10. Giret, S. et al. Selective separation and preconcentration of scandium with mesoporous silica. *ACS Appl. Mater. Interfaces.* **10**, 448−457 (2018).

11. Kano1, N. Pang, M. Deng, Y. & Imaizumi, H. Adsorption of rare earth elements (REEs) onto activated carbon modified with potassium permanganate (KMnO4). *J. Appl. Solution Chem. Model.* **6**, 51-61 (2017).

12. Roosen, J. et al. Recovery of scandium from leachates of Greek bauxite residue by adsorption on functionalized chitosan–silica hybrid materials. *Green Chem.* **18**, 2005–2013 (2016).

13. Sharaf, M., Yoshida, W., Kubota, F. & Goto, M. A novel binary-extractant-impregnated resin for selective recovery of scandium. *J. Chem. Eng. Jpn.* **52**, 49–55 (2019).

14. Frisch, M.J. et al., *Gaussian 16 Rev. C.01*. 2016: Wallingford, CT.

15. Wei, D. et al. Adsorption Properties of Hydrated Cr3+ Ions on Schiff-base Covalent Organic Frameworks: A DFT Study. *Chem.: Asian J.* **15**, 1140–1146 (2020).

16. Miralrio, A. & Sansores, L. E. Structures, stabilities, and electronic properties of fullerene C36 with endohedral atomic Sc, Y, and La: A dispersion-corrected DFT study. *Int. J. Quantum Chem.* **117**, e25335 (2017).
